# Supplementary material for: Identification and Actions of a Novel Third Maresin Conjugate in Tissue Regeneration: MCTR3
Source: PubMed Central journal article supplement (PMC4755597; doi:10.1371/journal.pone.0149319), 2016-02-16
Supplement: pone.0149319.s002.pdf [file pone.0149319.s002.pdf]

S1 Table. MCTRs and human PMN Survival in vitro <sup>δ</sup>

| Time     | Conditions                                 | DPBS <sup>+/+</sup> alone | MCTR1       | MCTR2       | MCTR3       |
|----------|--------------------------------------------|---------------------------|-------------|-------------|-------------|
| 24 hours | Annexin <sup>+</sup> , PI <sup>-</sup> (%) | 39.2 ± 8.3                | 39.9 ± 5.3  | 36.4 ± 8.6  | 37.8 ± 8.5  |
|          | Annexin <sup>+</sup> , PI <sup>+</sup> (%) | 42.1 ± 10.9               | 44.9 ± 8.9  | 48.1 ± 12.3 | 47.6 ± 14.5 |
| 48 hours | Annexin <sup>+</sup> , PI <sup>-</sup> (%) | 10.9 ± 2.8                | 6.9 ± 1.2   | 11.3 ± 4.4  | 12.8 ± 4.2  |
|          | Annexin <sup>+</sup> , PI <sup>+</sup> (%) | 64.3 ± 15.2               | 70.0 ± 13.9 | 69.2 ± 17.8 | 67.5 ± 11.1 |

<sup>δ</sup> Human PMN were incubated for either 24 or 48 hours in DPBS<sup>+/+</sup> (pH 7.2, 37°C, 5% CO<sub>2</sub>) in vehicle (DPBS<sup>+/+</sup> alone) or with the addition of 10nM MCTR1, MCTR2, or MCTR3 at time zero. Cell viability was assessed using flow cytometry with surface staining for Annexin V and Propidium Iodide. Results are mean ± SEM from n=3 healthy volunteers. Annexin<sup>+</sup>, PI<sup>-</sup> represents early apoptotic PMN and Annexin<sup>+</sup>, PI<sup>+</sup> represents late apoptotic PMN populations. There were no statistically significant differences in apoptotic populations between vehicle (DPBS<sup>+/+</sup> alone) and MCTR treated PMN by one-tailed T-test.
